# Supplementary material for: DNA methylation-mediated repression of exosomal miR-652-5p expression promotes oesophageal squamous cell carcinoma aggressiveness by targeting PARG and VEGF pathways
Source: PLOS journal article supplement (doi:10.1371/journal.pgen.1008592), 2020-04-28
Supplement: S6 (10.1371/journal.pgen.1008592.s006) [file journal.pgen.1008592.s006]

**Table S4. Sequences of specific primers.**

| CAMD1(human)-F | CCACAGGTGATGGGCAGAAT |
| --- | --- |
| CAMD1(human)-R | TTCCTGTGGGGGATCGGTAT |
| [EMP1 (human)-F](http://batchprimer3.bioinformatics.ucdavis.edu/batch_primers/60.172.183.175_1504167635/60.172.183.175_15041676352.html) | GCTGCCTATCAGTTTGATTTGGA |
| [EMP1 (human)-R](http://batchprimer3.bioinformatics.ucdavis.edu/batch_primers/60.172.183.175_1504167635/60.172.183.175_15041676352.html) | CACACAGGTATGCCCTGGTT |
| [MACF1 (human)-F](http://batchprimer3.bioinformatics.ucdavis.edu/batch_primers/60.172.183.175_1504167635/60.172.183.175_15041676353.html) | CTGTCTGGGGCTCCTGTTTT |
| [MACF1(human)-R](http://batchprimer3.bioinformatics.ucdavis.edu/batch_primers/60.172.183.175_1504167635/60.172.183.175_15041676353.html) | ATTTGCGGAATGCATTTAAGTACC |
| [NT5E (human)-F](http://batchprimer3.bioinformatics.ucdavis.edu/batch_primers/60.172.183.175_1504167635/60.172.183.175_15041676354.html) | ATTGATGAACGCAACAATGG |
| [NT5E (human)-R](http://batchprimer3.bioinformatics.ucdavis.edu/batch_primers/60.172.183.175_1504167635/60.172.183.175_15041676354.html) | GGTCAAATGTGCCTCCAAAG |
| [PARG (human)-F](http://batchprimer3.bioinformatics.ucdavis.edu/batch_primers/60.172.183.175_1504167635/60.172.183.175_15041676355.html) | GAGAAGAATGCCTCGGTGTG |
| [PARG (human)-R](http://batchprimer3.bioinformatics.ucdavis.edu/batch_primers/60.172.183.175_1504167635/60.172.183.175_15041676355.html) | TGCTCGCAAAAGATCTACCC |
| [PTEN (human)-F](http://batchprimer3.bioinformatics.ucdavis.edu/batch_primers/60.172.183.175_1504167635/60.172.183.175_15041676356.html) | GGACCAGAGACAAAAAGGGAGT |
| [PTEN (human)-R](http://batchprimer3.bioinformatics.ucdavis.edu/batch_primers/60.172.183.175_1504167635/60.172.183.175_15041676356.html) | TCCAGATGATTCTTTAACAGGTAGC |
| [RAP2B (human)-F](http://batchprimer3.bioinformatics.ucdavis.edu/batch_primers/60.172.183.175_1504167635/60.172.183.175_15041676357.html) | AAAATCACCTGGAGCTTAAAACA |
| [RAP2B (human)-R](http://batchprimer3.bioinformatics.ucdavis.edu/batch_primers/60.172.183.175_1504167635/60.172.183.175_15041676357.html) | AAATTGAGACCCTACCCGAGA |
| STIM2 (human)-F | CGGCACTGCTGCTTAGAGT |
| STIM2 (human)-R | CACATGCTCCCTGACTGAAA |
| [TCF12 (human)-F](http://batchprimer3.bioinformatics.ucdavis.edu/batch_primers/60.172.183.175_1504167635/60.172.183.175_15041676358.html) | GTGGTTATGCGGAGAC |
| [TCF12 (human)-R](http://batchprimer3.bioinformatics.ucdavis.edu/batch_primers/60.172.183.175_1504167635/60.172.183.175_15041676358.html) | AGCTCCTTGTCGGTCCCTA |
| VEGFA (human)-F | TGCCCGCTGCTGCTGTCTAAT |
| VEGFA (human)-R | TCTCCGCTCTGAGCAAGG |
| GAPDH (human)-F | TCCCATCAGAGTCCACACAAt |
| GAPDH (human)-R | GTCCAGTCAAACCAGCATCA |
